# Supplementary material for: Ultra-Fine Control of Silica Shell Thickness on Silver Nanoparticle-Assembled Structures
Source: MDPI journal article supplement (doi:10.3390/ijms222111983), 2021-11-05
Supplement: s1 [file s1]

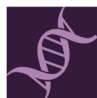

Communication

# Ultra-Fine Control of Silica Shell Thickness on Silver Nanoparticle-Assembled Structures

Eunil Hahm <sup>1,†</sup>, Ahla Jo <sup>1,†</sup>, Eun Ji Kang <sup>1</sup>, Sungje Bock <sup>1</sup>, Xuan-Hung Pham <sup>1</sup>, Hyejin Chang <sup>2,\*</sup> and Bong-Hyun Jun <sup>1,\*</sup>

<sup>1</sup> Department of Bioscience and Biotechnology, Konkuk University, Seoul 05029, Korea; green-ice@konkuk.ac.kr (E.H.), iamara0421@konkuk.ac.kr (A.J.), ejkang@konkuk.ac.kr (E.-J.K.), bsj4126@konkuk.ac.kr (S.B.), phamricky@konkuk.ac.kr (X.-H.P.)

<sup>2</sup> Division of Science Education, Kangwon National University, Chuncheon 24341, Korea

\* Correspondence: hjchang@kangwon.ac.kr (H.C.), bjun@konkuk.ac.kr (B.-H.J.); Tel.: +82-2-450-0521 (B.-H.J.)

† E.H. and A.J. contributed equally to this work.

## Supplementary materials

### 1. Characterization of the SiO<sub>2</sub>@Ag NPs with the Silica Coating

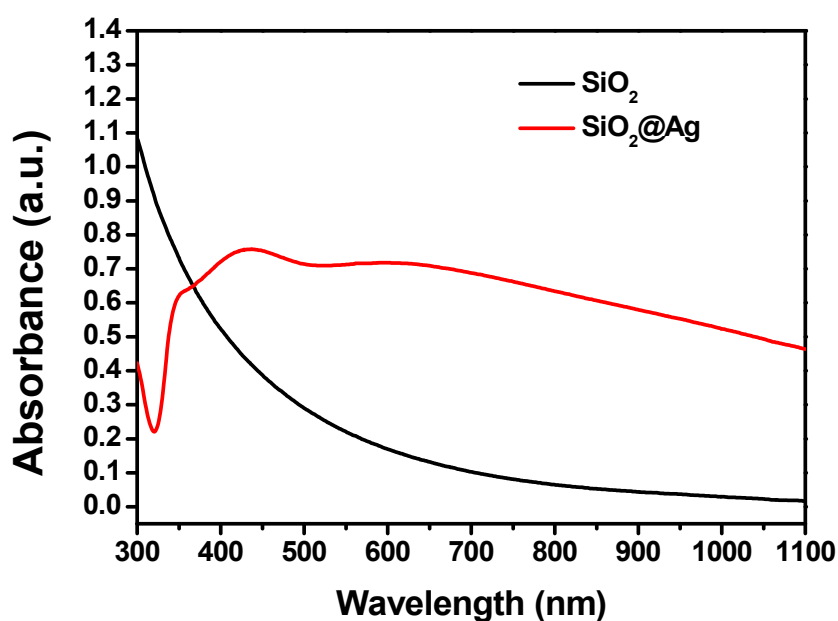

Figure S1. UV-vis spectra of SiO<sub>2</sub> and SiO<sub>2</sub>@Ag NPs.

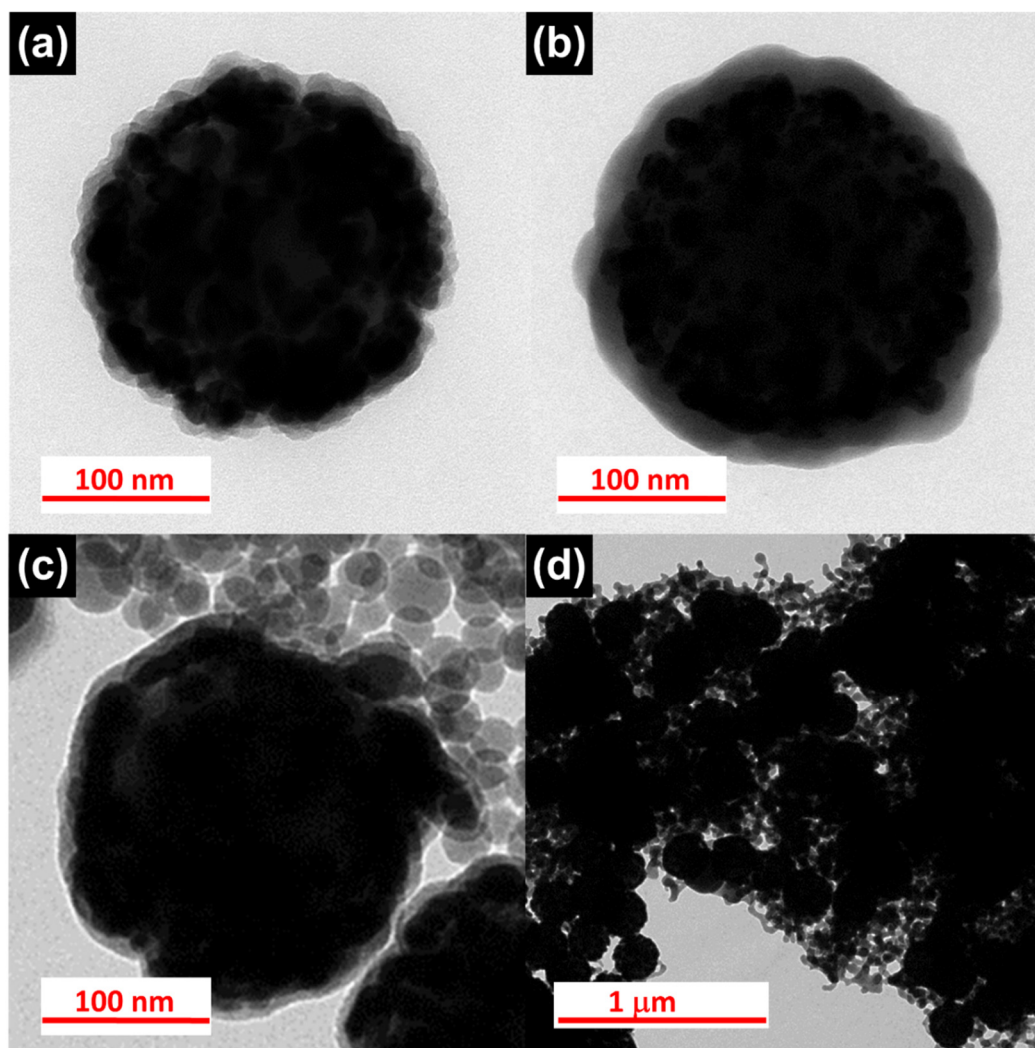

**Figure S2.** TEM images of  $\text{SiO}_2\text{@Ag@SiO}_2$  NPs prepared by using  $\text{Na}_2\text{SiO}_3$  with the following concentrations: (a) 45  $\mu\text{mol}$ , (b) 90  $\mu\text{mol}$ , (c) 180  $\mu\text{mol}$ , and (d) 360  $\mu\text{mol}$ .

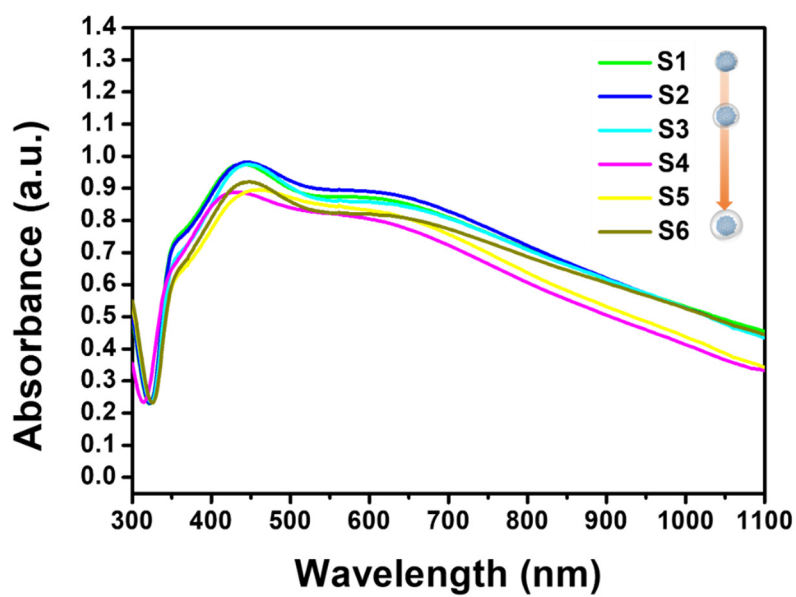

**Figure S3.** UV-Vis spectra of  $\text{SiO}_2\text{@Ag@SiO}_2$  NPs with various silica shell thicknesses prepared under different conditions (S1–S6).

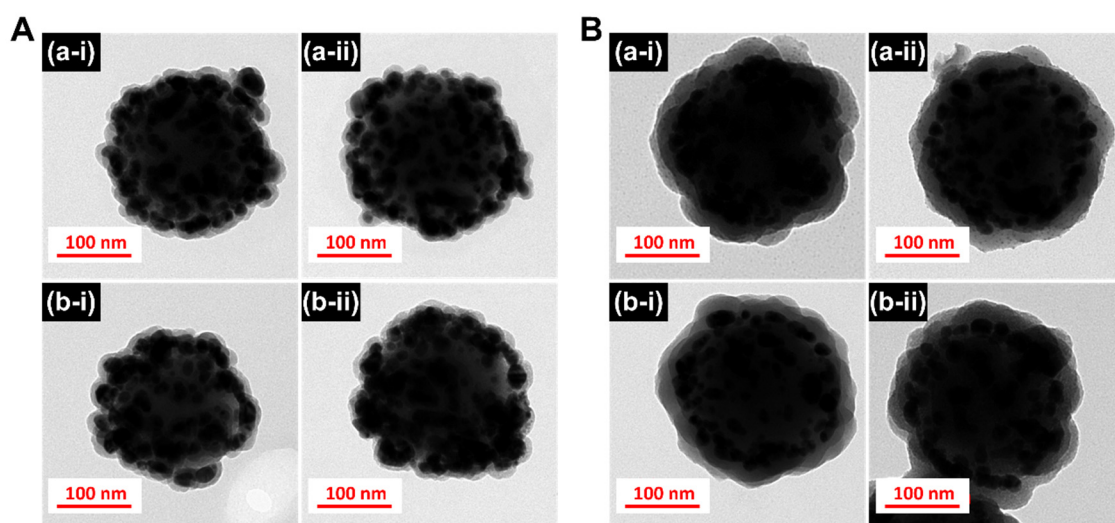

**Figure S4.** TEM images of SiO<sub>2</sub>@Ag@SiO<sub>2</sub> NPs prepared by A) Na<sub>2</sub>SiO<sub>3</sub> and B) Na<sub>2</sub>SiO<sub>3</sub> + TEOS stored in (a) EtOH and (b) water for (i) 0 days and (ii) 10 days.

## 2. Calculation of The Number of Silica NPs and the Silica Shell Thickness on SiO<sub>2</sub>@Ag NPs

### 2.1. Calculation of the Number of Silica NPs

The transmission electron microscopy (TEM) images reveal that the SiO<sub>2</sub> NPs usually have a spherical shape (Figure 1a). The silica nanoparticles were assumed to be perfectly spherical, and the volume of the silica nanoparticle was calculated from the measured diameter (Table S1). The mass of one SiO<sub>2</sub> NP is then calculated using the density of SiO<sub>2</sub> and the volume of one SiO<sub>2</sub> NP. Based on this result, the number of SiO<sub>2</sub> NPs per milligram is calculated as shown in Table S1.

**Table S1.** Experiment parameters of silica nanoparticle number, Na<sub>2</sub>SiO<sub>3</sub> and TEOS concentration in S1–S6.

|    | Weight of SiO <sub>2</sub> (mg) | Number of NPs            | Na <sub>2</sub> SiO <sub>3</sub> (μL) | Na <sub>2</sub> SiO <sub>3</sub> (μmol) | TEOS (μL) | TEOS (mM) |
|----|---------------------------------|--------------------------|---------------------------------------|-----------------------------------------|-----------|-----------|
| S1 | 20                              | 4.024 × 10 <sup>12</sup> | 14.4                                  | 90                                      | -         | -         |
| S2 | 10                              | 2.012 × 10 <sup>12</sup> | 14.4                                  | 90                                      | -         | -         |
| S3 | 5                               | 1.006 × 10 <sup>12</sup> | 14.4                                  | 90                                      | -         | -         |
| S4 | 10                              | 2.012 × 10 <sup>12</sup> | 14.4                                  | 90                                      | 20        | 1.16      |
| S5 | 10                              | 2.012 × 10 <sup>12</sup> | 14.4                                  | 90                                      | 40        | 2.33      |
| S6 | 10                              | 2.012 × 10 <sup>12</sup> | 14.4                                  | 90                                      | 60        | 3.49      |

### 2.2. Calculation of the Number of Silica NPs and the Silica Shell Thickness on SiO<sub>2</sub>@Ag NP

We assumed that the added Na<sub>2</sub>SiO<sub>3</sub> reacted completely and converted to SiO<sub>2</sub>.

As the Ag NPs are irregularly attached to SiO<sub>2</sub> NPs, it is difficult to obtain the correct diameter and the volume of the SiO<sub>2</sub>@Ag NPs. To measure the diameter of the SiO<sub>2</sub>@Ag NPs, we assumed that the Ag NPs formed a smooth shell on the surface of the SiO<sub>2</sub> NPs, forming perfectly spherical SiO<sub>2</sub>@Ag NPs.

The silica shell thickness was calculated by Equation 1

$$\text{SiO}_2 \text{ shell thickness} = \frac{\left[ 2 \times \sqrt[3]{\left( \frac{n \times M}{\rho \times N} + V \right) \times \frac{3}{4\pi}} \right] - d}{2} \quad (1)$$

where  $n$  is the number of moles of  $\text{Na}_2\text{SiO}_3$  or TEOS,  $M$  is molecular weight of  $\text{SiO}_2$ ,  $\rho$  is the density of  $\text{SiO}_2$ ,  $N$  is number of NPs,  $V$  is the volume of  $\text{SiO}_2@\text{Ag}$ , and  $d$  is the diameter of  $\text{SiO}_2@\text{Ag}$ .

The calculated silica shell thickness, the observed silica shell thickness, and their ratio are shown in Table S2.

**Table S2.** Diameter and shell thickness of  $\text{SiO}_2$  NPs,  $\text{SiO}_2@\text{Ag}$  NPs and S1-S6 ( $\text{SiO}_2@\text{Ag}@\text{SiO}_2$  NPs).

|                                           | Diameter<br>(nm) | Shell thickness<br>(nm) |                         | a/b  |
|-------------------------------------------|------------------|-------------------------|-------------------------|------|
|                                           |                  | Observed <sup>a</sup>   | Calculated <sup>b</sup> |      |
| $\text{SiO}_2$                            | 153±2.4          |                         |                         |      |
| $\text{SiO}_2@\text{Ag}$                  | 192±7.5          |                         |                         |      |
| S1, $\text{SiO}_2@\text{Ag}@\text{SiO}_2$ |                  | 5.8±0.9                 | 4.2±0.2                 | 1.38 |
| S2, $\text{SiO}_2@\text{Ag}@\text{SiO}_2$ |                  | 9.7±1.2                 | 8.1±0.3                 | 1.20 |
| S3, $\text{SiO}_2@\text{Ag}@\text{SiO}_2$ |                  | 16.5±1.3                | 15.0±0.5                | 1.10 |
| S4, $\text{SiO}_2@\text{Ag}@\text{SiO}_2$ |                  | 23.5±1.8                | 16.4±0.5                | 1.43 |
| S5, $\text{SiO}_2@\text{Ag}@\text{SiO}_2$ |                  | 32.6±1.3                | 22.4±0.6                | 1.46 |
| S6, $\text{SiO}_2@\text{Ag}@\text{SiO}_2$ |                  | 40.1±2.1                | 27.8±0.6                | 1.44 |

<sup>a</sup> Observed silica shell thickness. <sup>b</sup> Calculated silica shell thickness.
